# Supplementary material
Source: bioRxiv or medRxiv preprint supplement (https://www.biorxiv.org/highwire/filestream/101088/field_highwire_adjunct_files/9/324509-2.pdf)
Supplement: Supplementary file [file 324509-2.pdf]

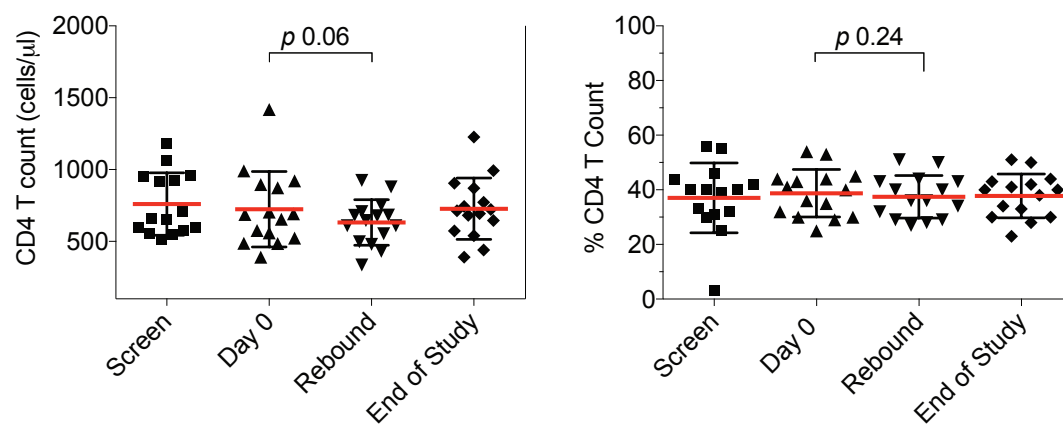

**Supplementary Figure 2.** Change in CD4 T cell counts over the course of the study
